# Supplementary material for: Low Galectin-3 Expression Level in Primary Tumors Is Associated with Metastasis in T1 Lung Adenocarcinoma
Source: MDPI journal article supplement (doi:10.3390/jcm9061990), 2020-06-25
Supplement: s1 [file s1]

## Supplementary Materials

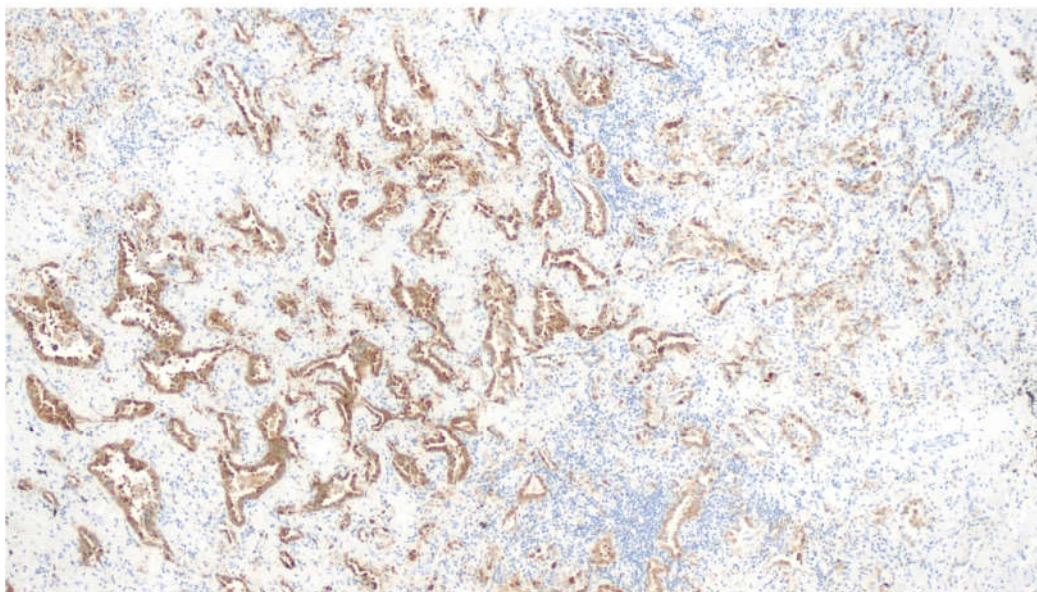

**Figure S1.** Intratumoral heterogeneity of galectin-3 expression, 40 ×.
